# Supplementary material for: Combining stacked polygenic scores with clinical risk factors improves cardiovascular risk prediction in people with type 2 diabetes
Source: bioRxiv or medRxiv preprint supplement (doi:10.1101/2022.09.01.22279477), 2023-09-28
Supplement: Supplementary file [file media-3.pdf]

| <b>Group</b> | <b>Outcome</b>  | <b>PGS Mean</b>     | <b>PGS SD</b>       | <b>Status</b> |
|--------------|-----------------|---------------------|---------------------|---------------|
| wo T2DM/CVD  | CVD + AF + HF   | -2.3570906990514127 | 0.28393699434913483 | Case          |
| wo T2DM/CVD  | CVD + AF + HF   | -2.435171033205664  | 0.24706280572100672 | Control       |
| w T2DM       | CVD + AF + HF   | -1.5703706300529936 | 0.12132636847327737 | Case          |
| w T2DM       | CVD + AF + HF   | -1.627422419510718  | 0.12248721799588    | Control       |
| w T2DM&CVD   | CVD + AF + HF   | -0.2289477010332008 | 0.03500419235224144 | Case          |
| w T2DM&CVD   | CVD + AF + HF   | -0.240070705592204  | 0.03764723472353872 | Control       |
| wo T2DM/CVD  | CVD             | -2.8001564779709587 | 0.18772582958374517 | Case          |
| wo T2DM/CVD  | CVD             | -2.8444739964531065 | 0.1804481752981166  | Control       |
| w T2DM       | CVD             | -1.5522870680270844 | 0.6450387033425716  | Case          |
| w T2DM       | CVD             | -1.9239929810552177 | 0.58330440896246    | Control       |
| w T2DM&CVD   | CVD             | 1.2507992652845834  | 0.46256423701440985 | Case          |
| w T2DM&CVD   | CVD             | 1.055187963064099   | 0.463871141618513   | Control       |
| wo T2DM/CVD  | CHD             | -3.055144412489871  | 0.2022573403338721  | Case          |
| wo T2DM/CVD  | CHD             | -3.1085482047923576 | 0.19672802703610165 | Control       |
| w T2DM       | CHD             | -1.8968952820013036 | 0.7489010884211786  | Case          |
| w T2DM       | CHD             | -2.4316062601219732 | 0.5900360903305848  | Control       |
| w T2DM&CVD   | CHD             | -0.3418433568384666 | 0.2374471948872424  | Case          |
| w T2DM&CVD   | CHD             | -0.4879197436939358 | 0.29056216822827624 | Control       |
| wo T2DM/CVD  | Ischemic stroke | -4.542423171648233  | 0.22949185601327698 | Case          |
| wo T2DM/CVD  | Ischemic stroke | -4.591848152738551  | 0.21496432163241475 | Control       |
| w T2DM       | Ischemic stroke | -3.7946887548796404 | 1.2079725649365278  | Case          |
| w T2DM       | Ischemic stroke | -4.142196471391346  | 0.9045728715789572  | Control       |
| w T2DM&CVD   | Ischemic stroke | -2.6227361720132802 | 0.8365596089210157  | Case          |
| w T2DM&CVD   | Ischemic stroke | -2.5547187443216623 | 0.7794091045210637  | Control       |
| wo T2DM/CVD  | AF              | -2.978129098711699  | 0.5990561623785567  | Case          |
| wo T2DM/CVD  | AF              | -3.2728407812080658 | 0.5303586112442533  | Control       |
| w T2DM       | AF              | -2.273239210716222  | 0.434340276529167   | Case          |
| w T2DM       | AF              | -2.5316846400757647 | 0.4278461080703035  | Control       |
| w T2DM&CVD   | AF              | -1.2600855569932892 | 0.37661618364277827 | Case          |
| w T2DM&CVD   | AF              | -1.380843360662616  | 0.3493523353805223  | Control       |
| wo T2DM/CVD  | HF              | -4.41044289124218   | 0.4155039564584552  | Case          |
| wo T2DM/CVD  | HF              | -4.537776518769428  | 0.3846114842964483  | Control       |
| w T2DM       | HF              | -3.2647273674271915 | 1.1228185872951044  | Case          |
| w T2DM       | HF              | -3.75034165474536   | 0.9953122419609423  | Control       |
| w T2DM&CVD   | HF              | -1.1955015372413107 | 0.3547356482816017  | Case          |
| w T2DM&CVD   | HF              | -1.299879037759858  | 0.3674153282973063  | Control       |
